# Supplementary material
Source: publisher figshare collection journal article supplement (https://plos.figshare.com/articles/dataset/_/1130144)
Supplement: Supplementary file [file 1]

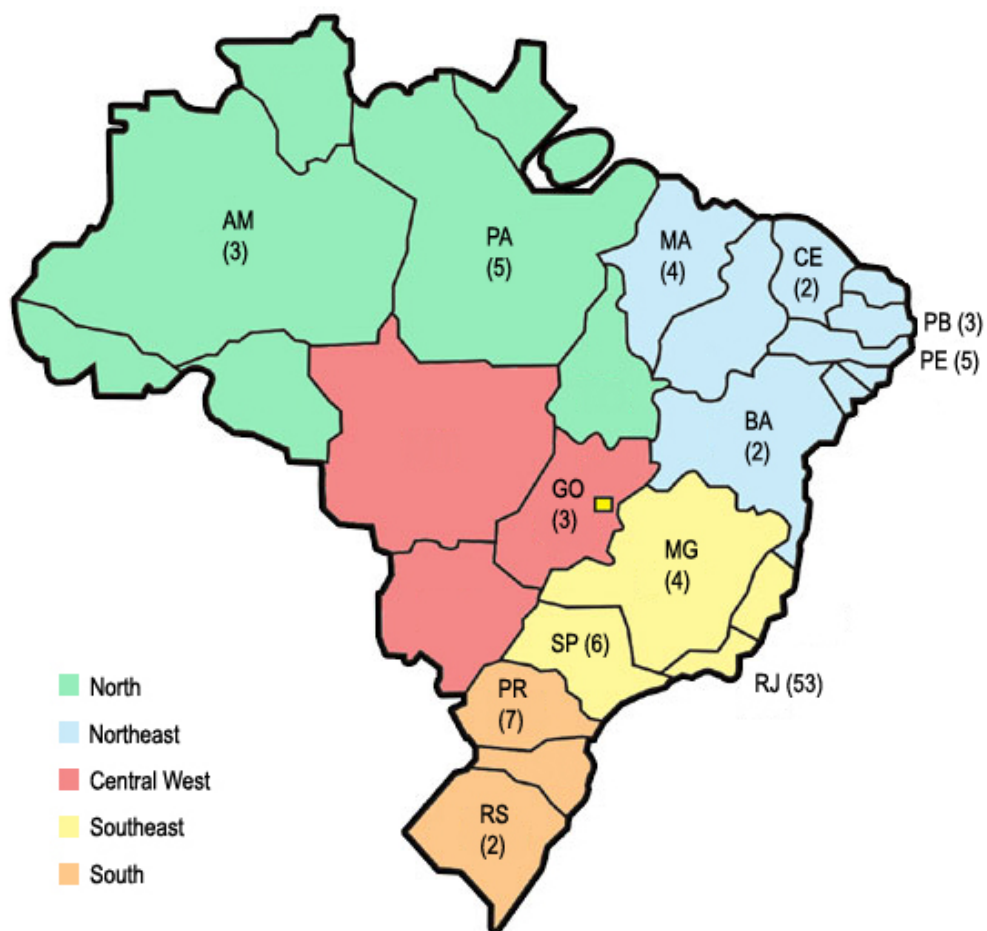

**Figure S1:** Map of Brazil showing the different states and the number of isolates analyzed. States: AM – Amazonas; PA – Pará; MA – Maranhão; CE – Ceará; PB – Paraíba; PE – Pernambuco; BA – Bahia; GO – Goiás; MG – Minas Gerais; RJ – Rio de Janeiro; SP – São Paulo; PR – Paraná; RS – Rio Grande do Sul.
